# Supplementary material for: Pore-controlled synthesis of Mn2O3microspheres for ultralong-life lithium storage electrode
Source: Royal Society of Chemistry journal article supplement (doi:10.1039/c2ra22735e), 2012-11-28
Supplement: c2ra22735e.pdf [file c2ra22735e.pdf]

## Electronic Supplementary Information

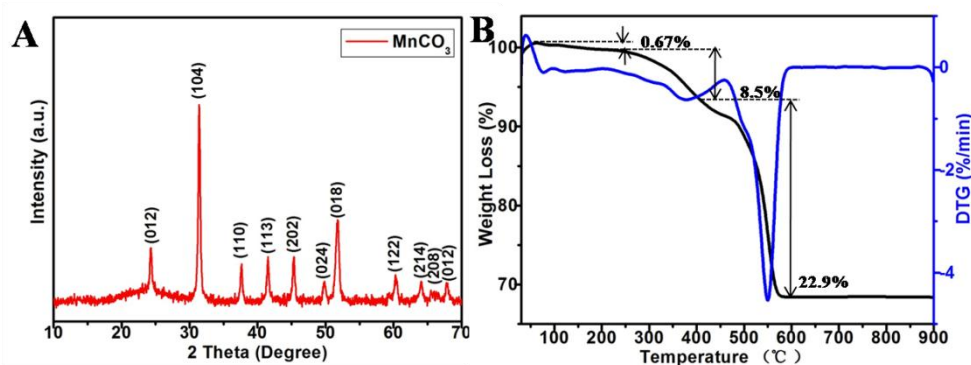

**Figure S1.** (A) XRD patterns of precursor MnCO<sub>3</sub> microspheres. (B) TG-DTG curves of as-prepared precursor MnCO<sub>3</sub>.

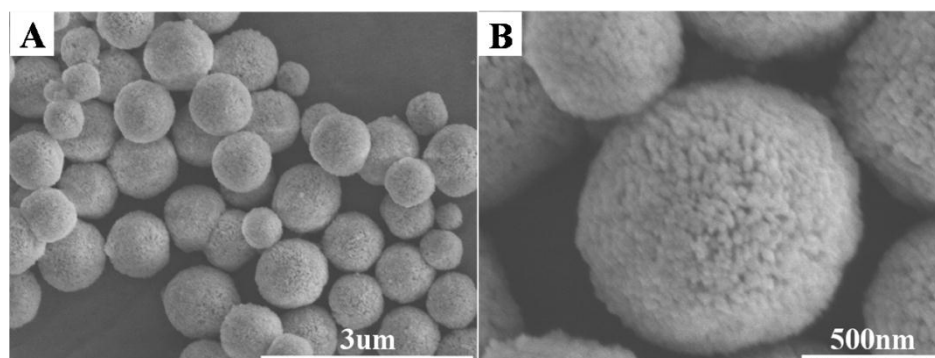

**Figure S2.** (A, B) SEM images of precursor MnCO<sub>3</sub> microspheres.

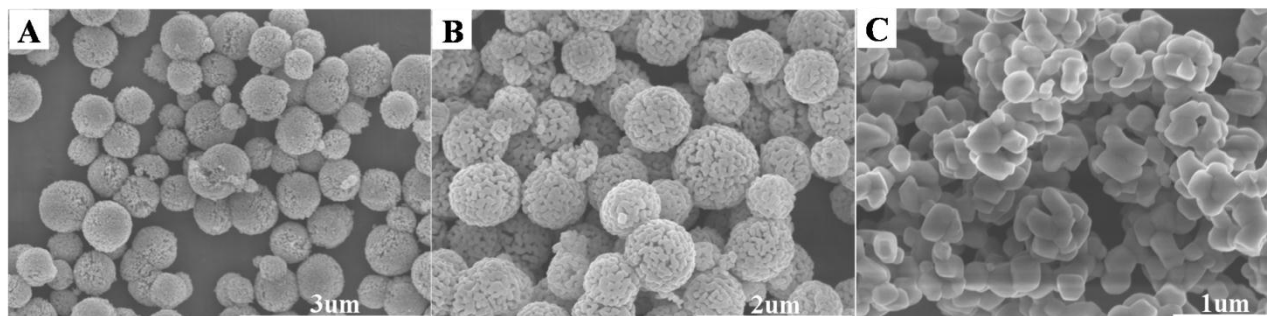

**Figure S3.** (A-C) SEM images with low magnification of Mn<sub>2</sub>O<sub>3</sub> microspheres annealed at 500, 700 and 900°C, respectively

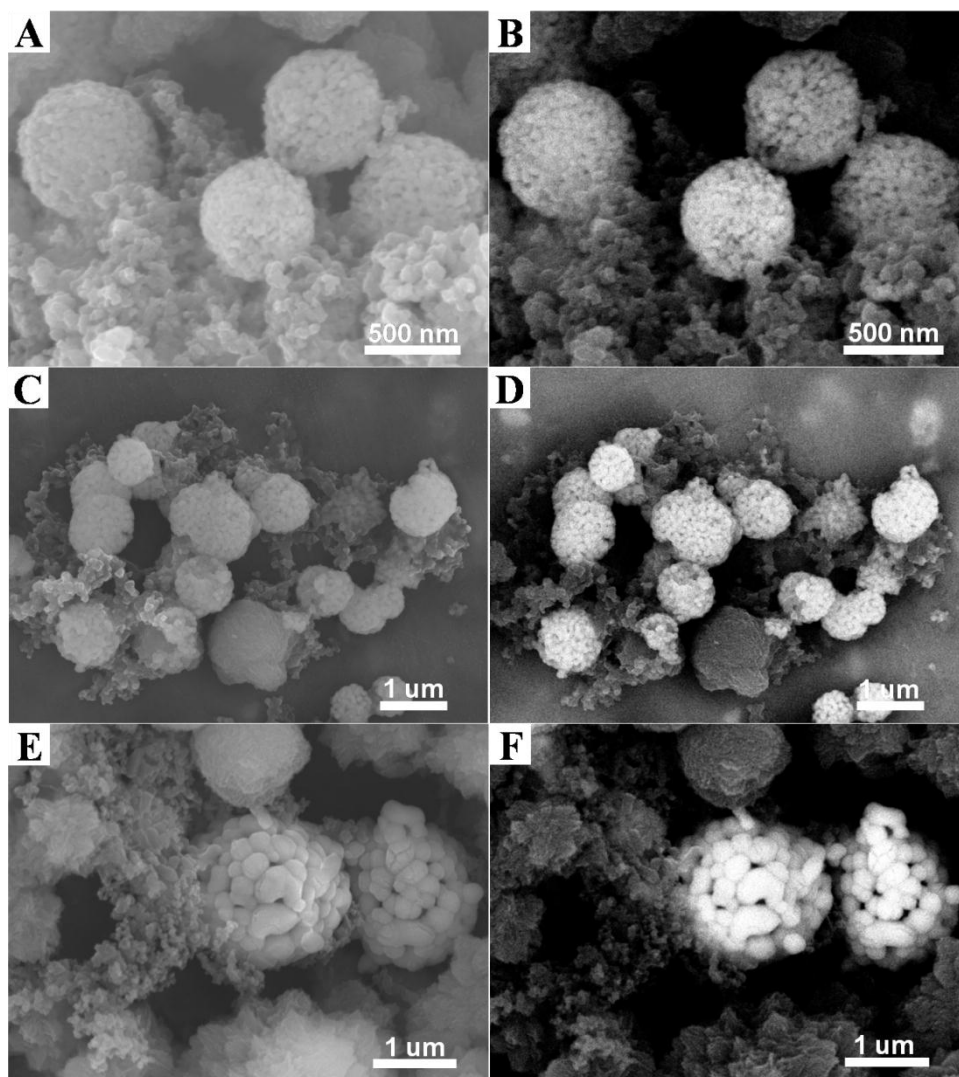

**Figure S4.** SEM images and corresponding backscattered electron images of  $\text{Mn}_2\text{O}_3$  electrode materials after rate cyclability at different current density as anode for LIBs, Sample 500 (A, B), Sample 700 (C, D) and Sample 900 (E, F), respectively.
